# Supplementary material
Source: publisher site journal article supplement (https://www.dovepress.com/article/495659)
Supplement: Supplementary file 1 [file get_supplementary_file.php]

**A Supplementary Figure 1**


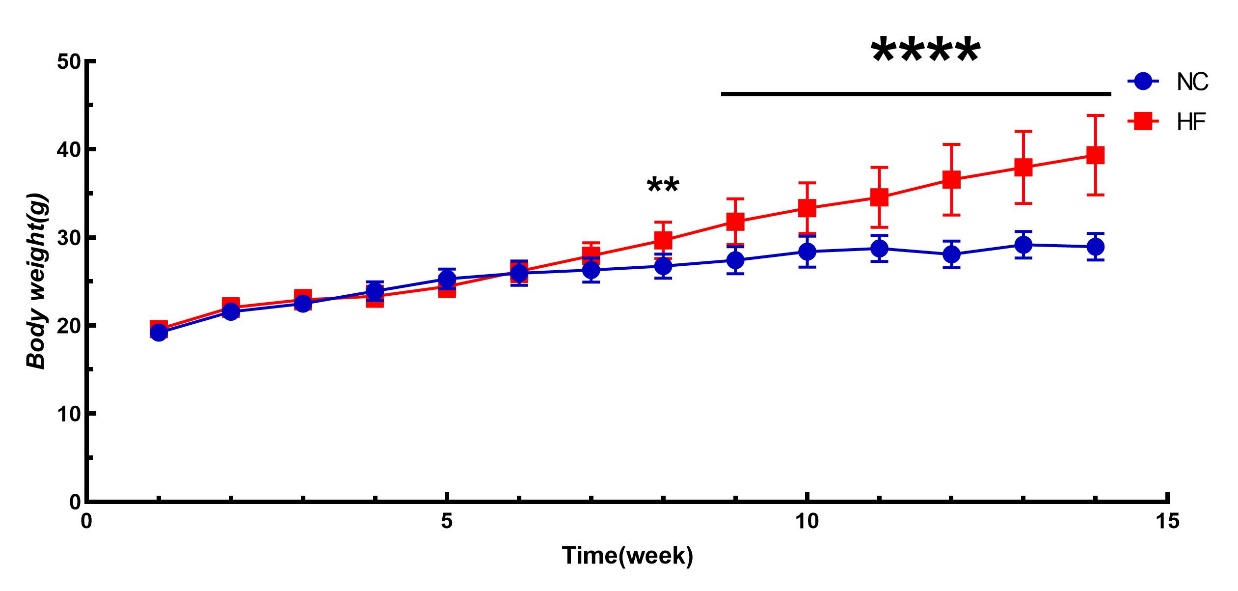


**
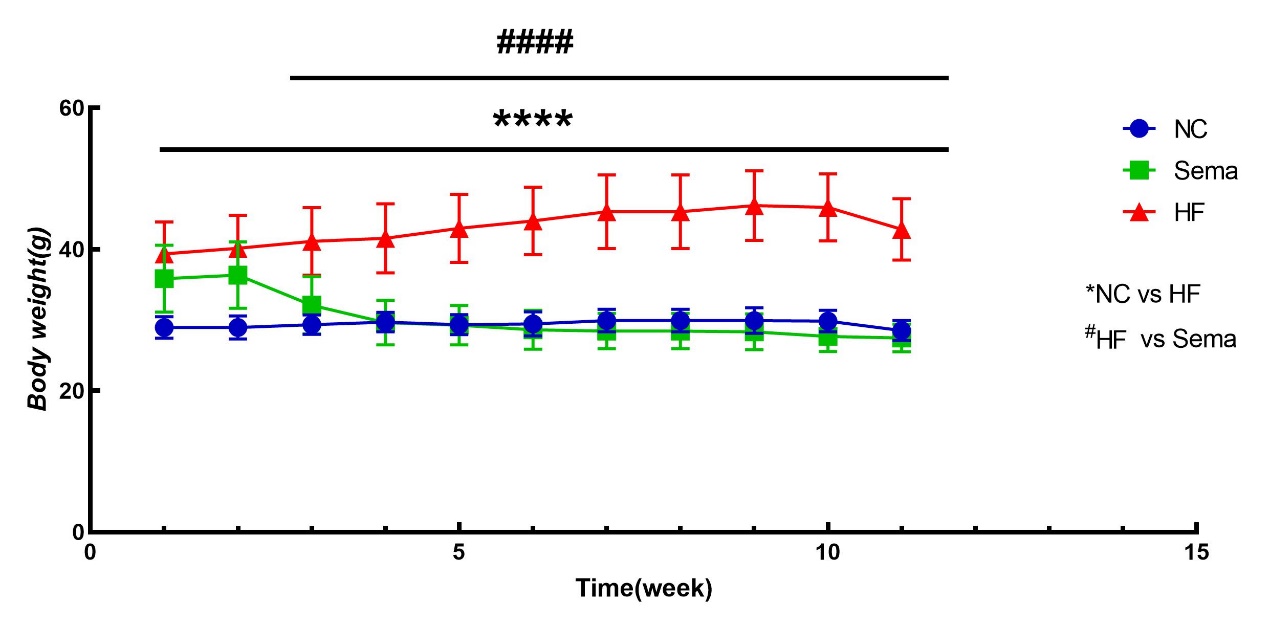
Supplementary Figure 2**

**Supplementary Figure 3**


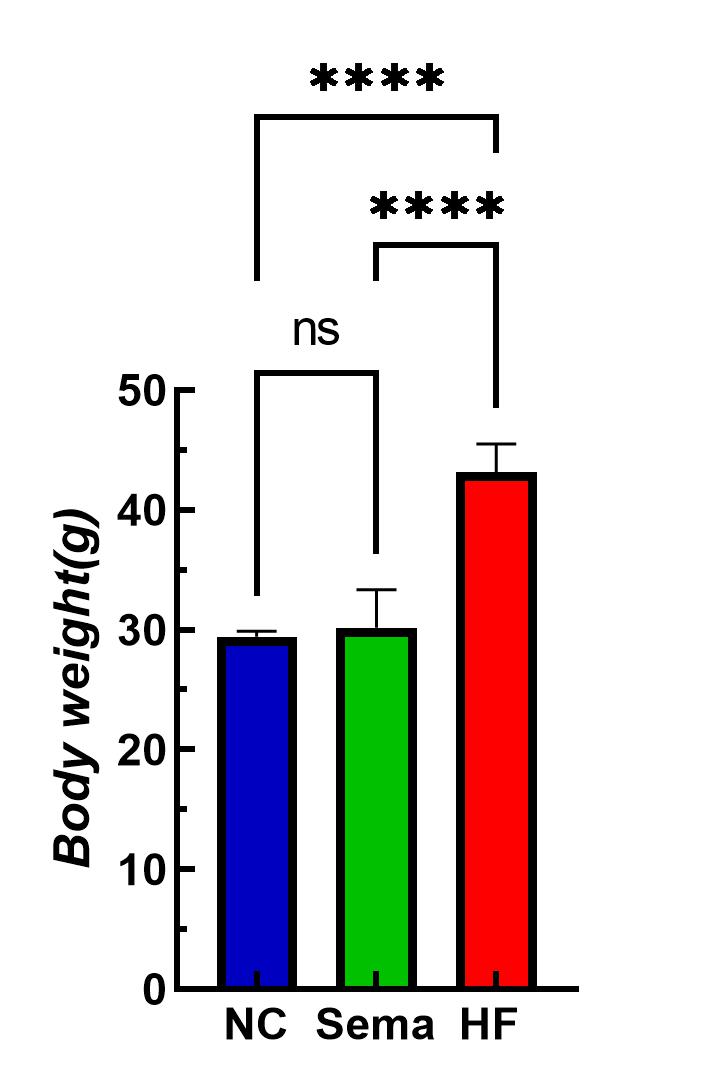


**Supplementary Figure 4**


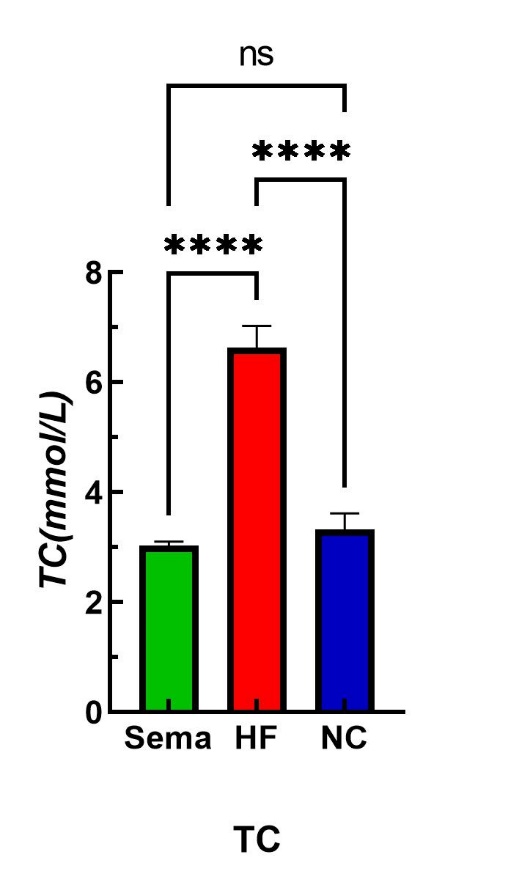


**Supplementary Figure 5**

**
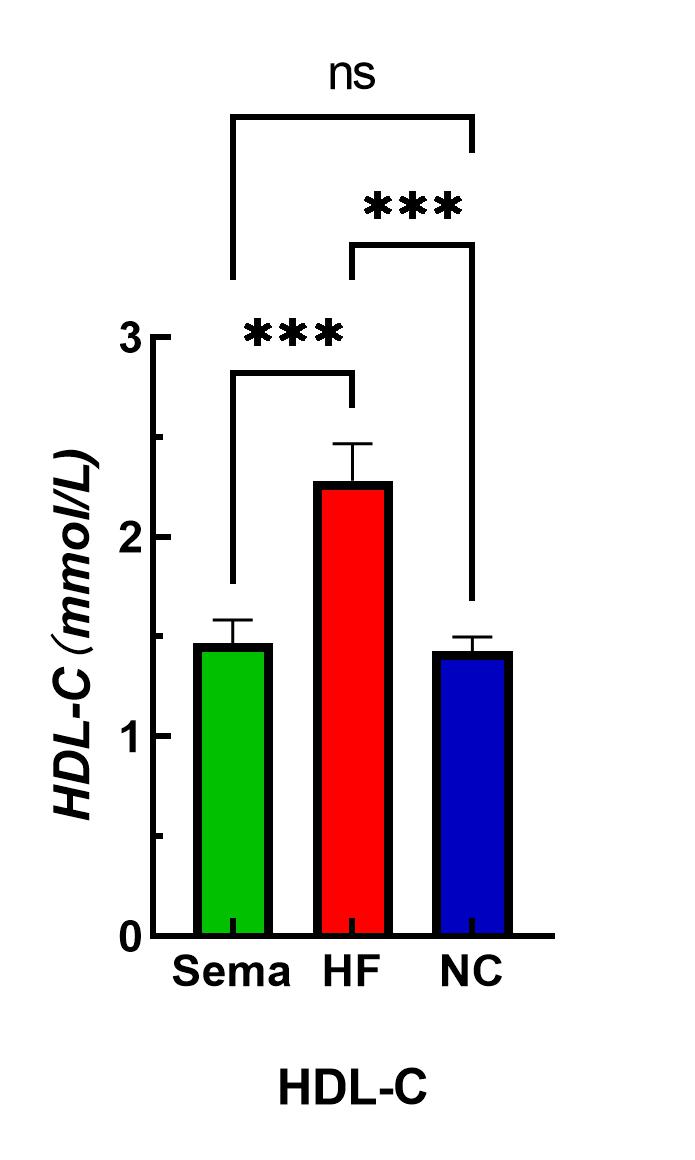
**

**Supplementary Figure 6**

**
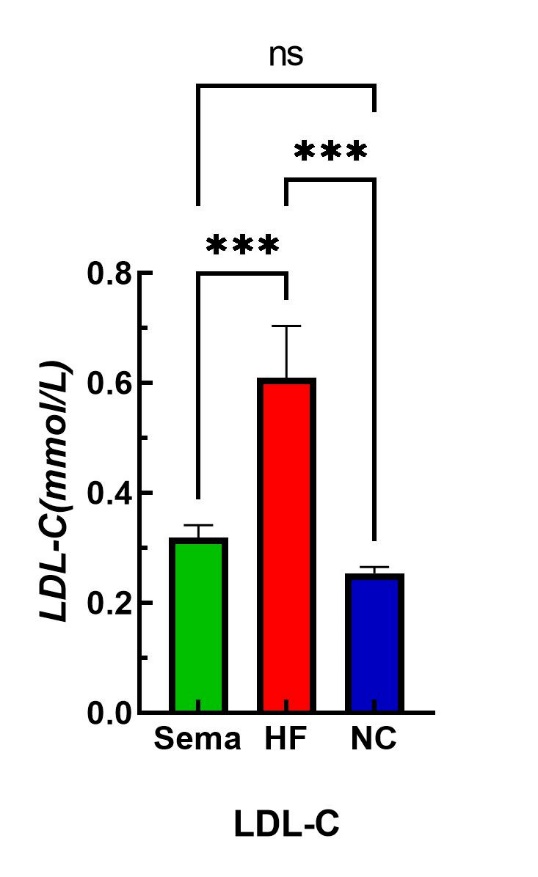
**

**Supplementary Figure 7**

**
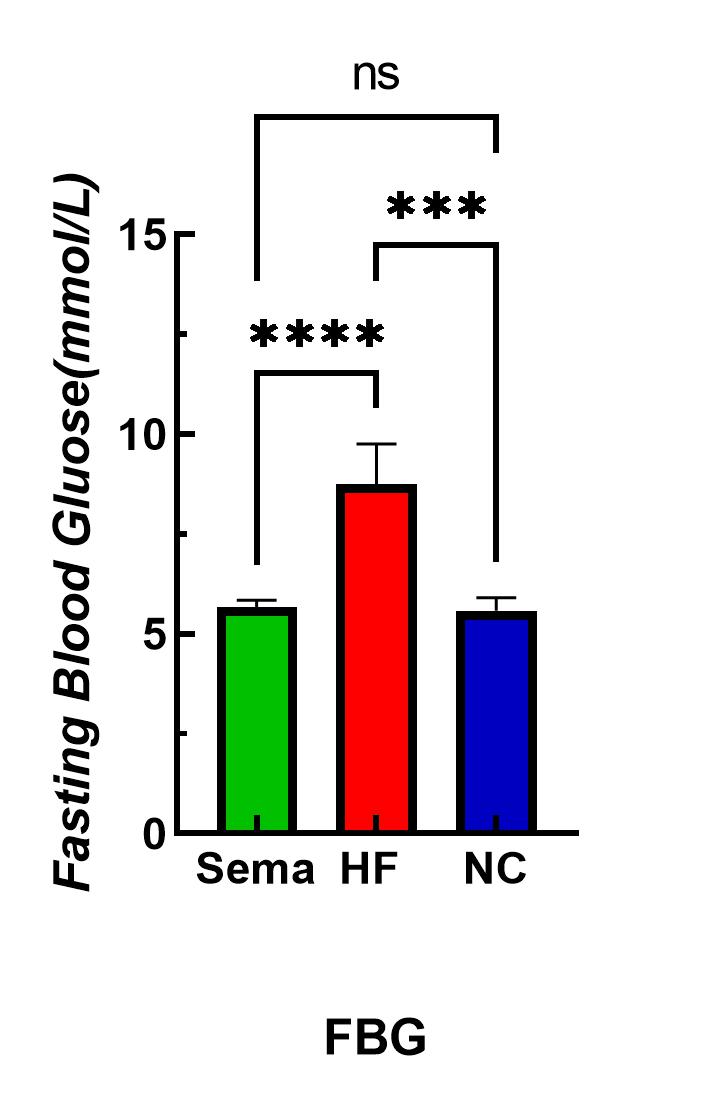
**

**
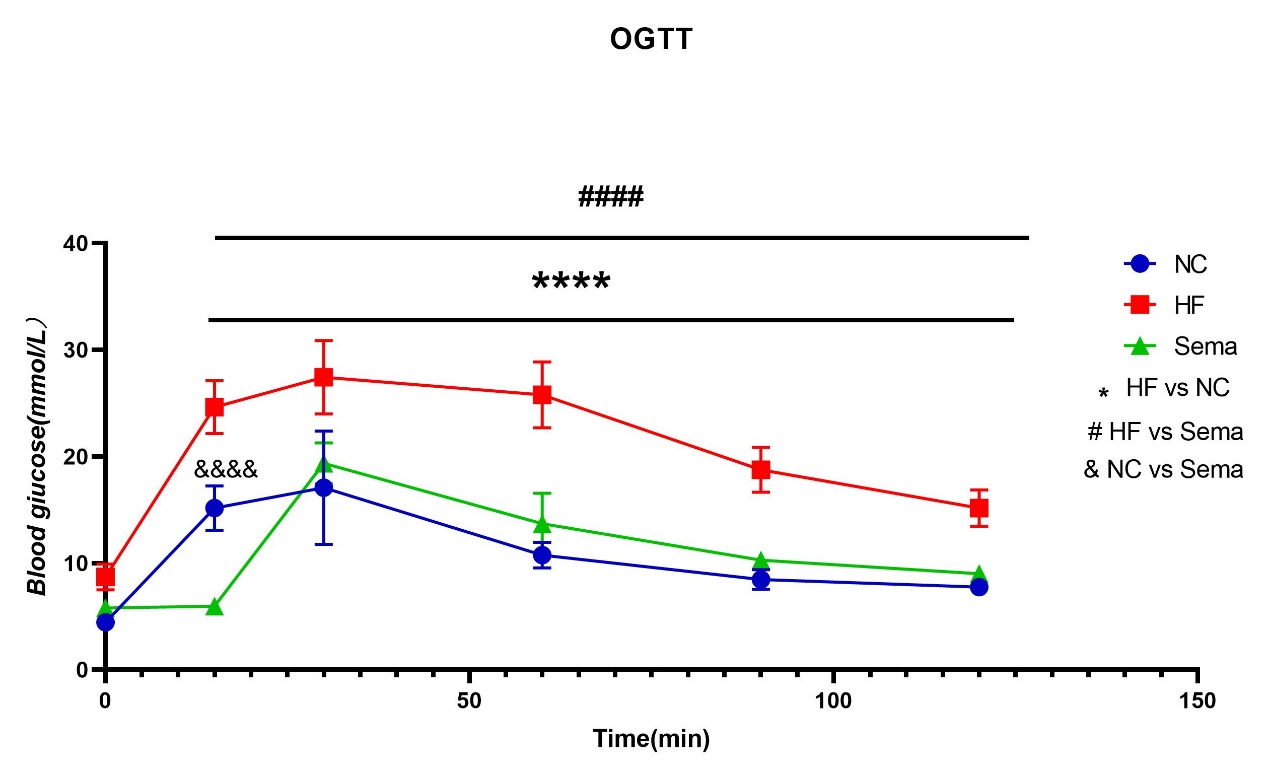
Supplementary Figure 8**

**Supplementary Figure 9**


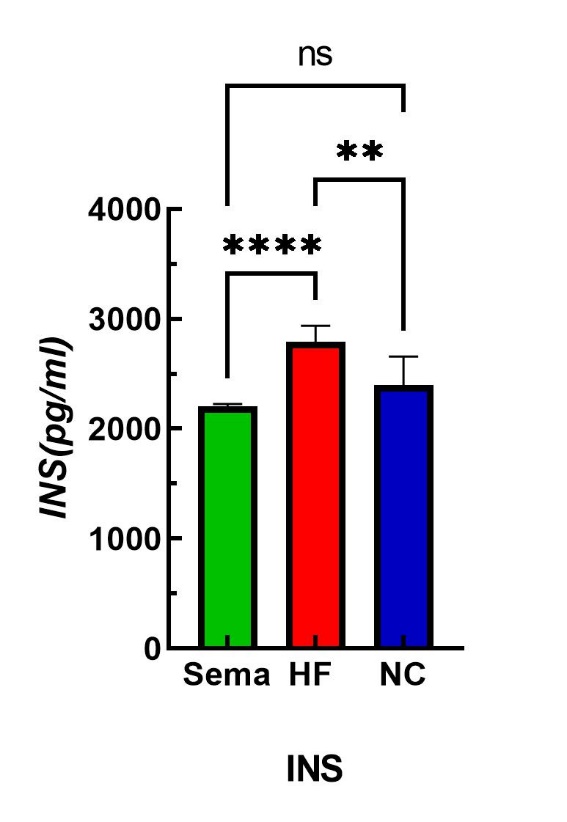


**Supplementary Figure 10**


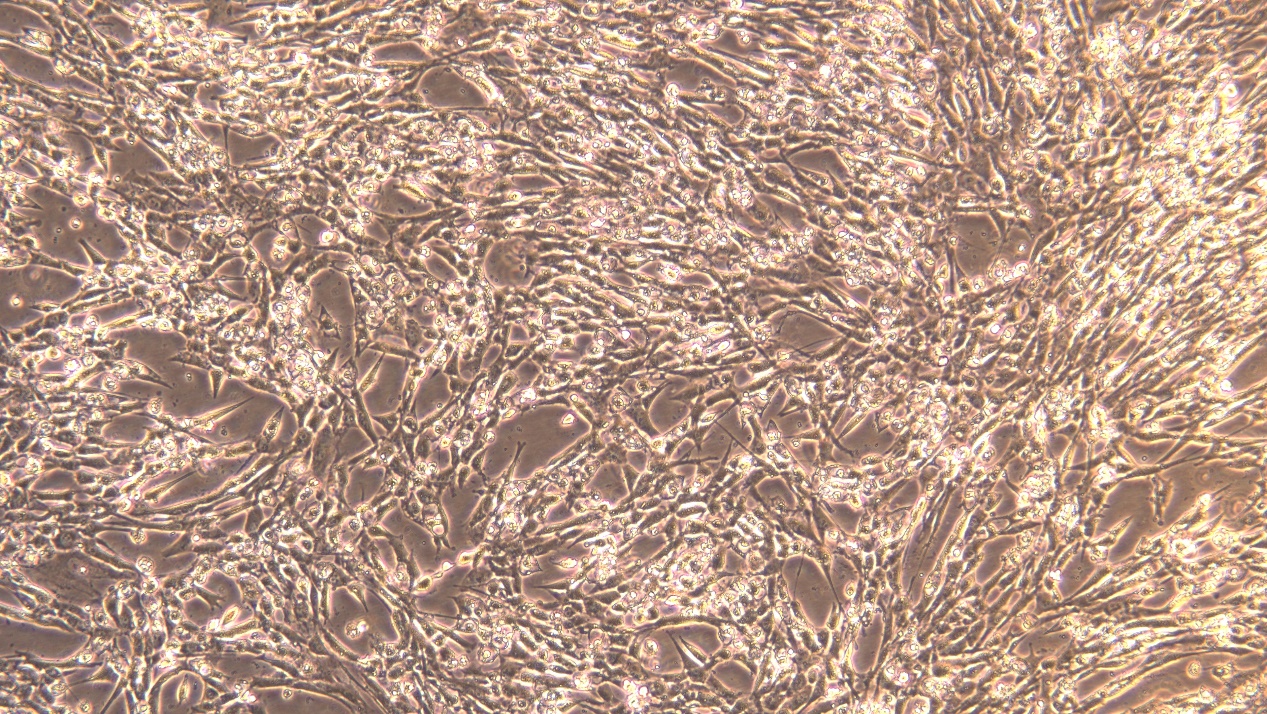


**Supplementary Figure 11**


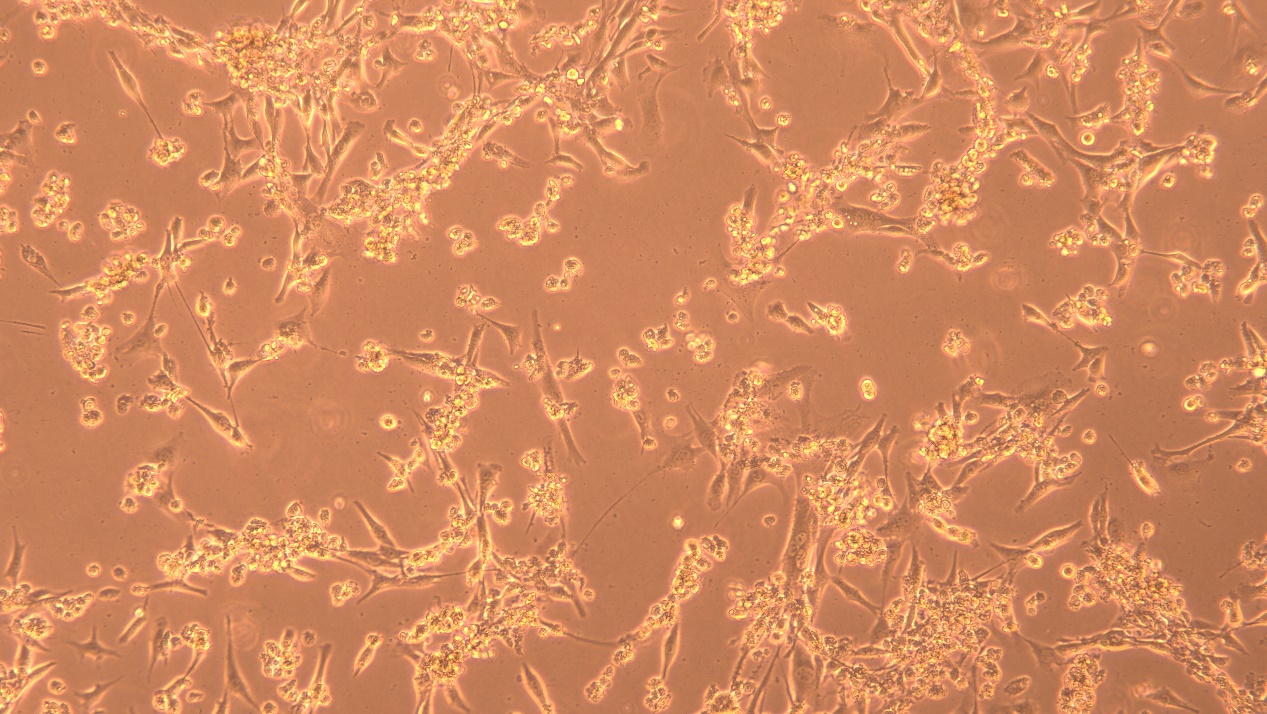


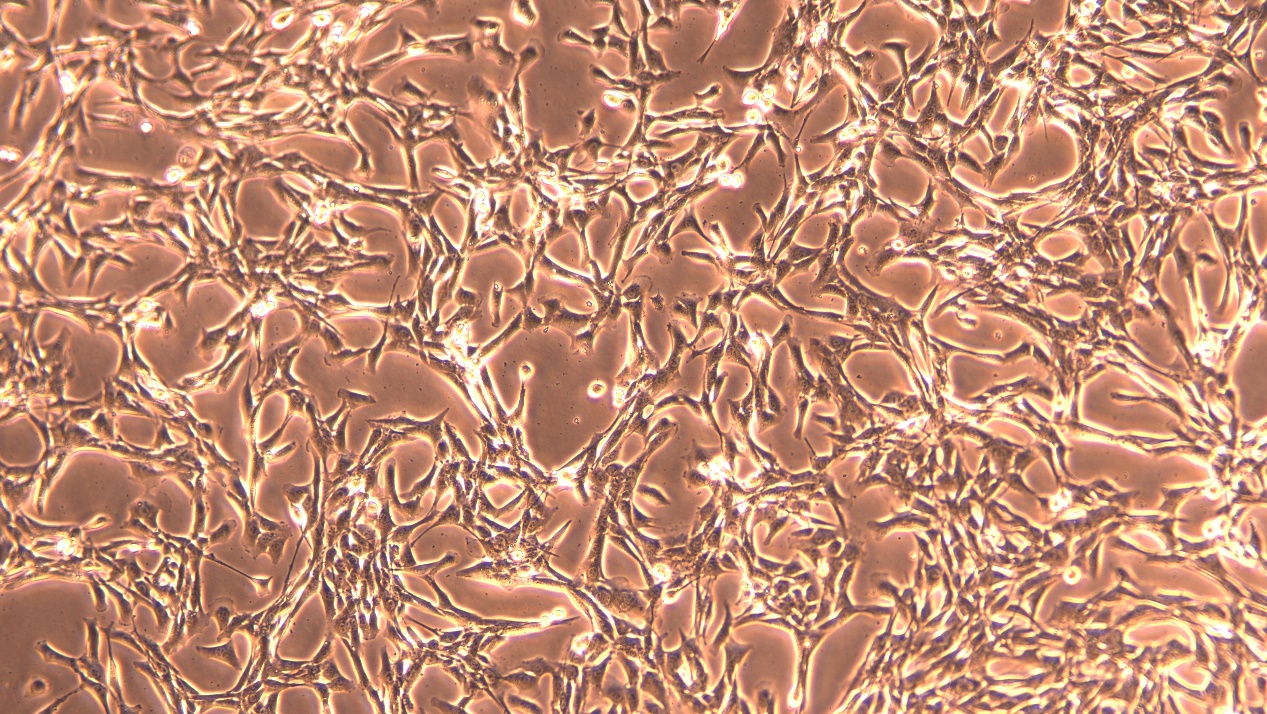
**Supplementary Figure 12**

**
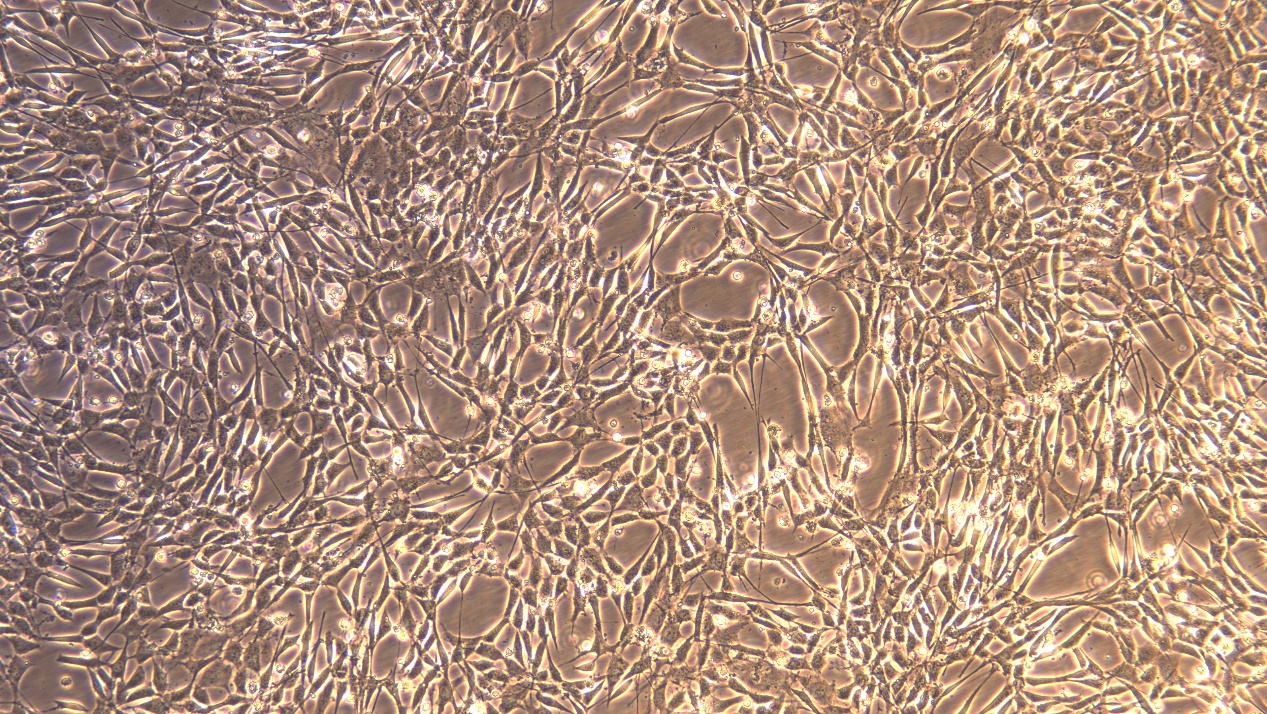
Supplementary Figure 13**

**Supplementary file:**

**Supplementary file（1）-（3）Effect of high-fat diet and semaglutide on body weight in mice.**

（1）Trends in body weight of mice in the HF group and the NC group during 14 weeks

****P<0.001, **P<0.05

（2）The effect of semaglutide on mouse weight.

****P<0.001，NC vs HF。#### P<0.001，HF vs Sema

（3）The effect of HFD and semaglutide on mouse weight.

****P<0.001，ns P>0.05

**（4）-（9）Semaglutide improves lipid metabolism disorders and Glucose Levels.**

（4）TC （5）HDL-C（6）LDL-C（7）FBG（8）OGTT（9）INS

****P<0.001，#### P<0.001,*** P<0.01，** P<0.05，ns P>0.05

**（10）-（13）Changes in cell morphology**

（10）Cells were treated with PA for 24h

（11）Cells were treated with semaglutide for 24h

（12）Si-HSDL2 cell

（13）NC cell
